# Supplementary material for: Long-Term Influence of Paraspinal Muscle Quantity in Adolescent Idiopathic Scoliosis Following Deformity Correction by Posterior Approach
Source: MDPI journal article supplement (doi:10.3390/jcm10204790), 2021-10-19
Supplement: s1 [file s1]

**Table S1.** Intra-examiner reproducibility and inter-examiner reliability by intraclass correlation coefficient

| Variables         | Intra-Examiner |                       | Inter-Examiner |                       |
|-------------------|----------------|-----------------------|----------------|-----------------------|
|                   | ICC            | Strength of Agreement | ICC            | Strength of Agreement |
| CSA ratio         | ICC            | Strength of Agreement | ICC            | Strength of Agreement |
| Multifidus (%)    | 0.80           | Excellent             | 0.76           | Excellent             |
| Erector spine (%) | 0.91           | Excellent             | 0.85           | Excellent             |
| Psoas major (%)   | 0.84           | Excellent             | 0.79           | Excellent             |

Inter-rater reliability was interpreted with the Fleiss guidelines. According to Fleiss guidelines, strength of agreement was set as follows: ICC < 0.4: poor, ICC: 0.4 to 0.75: fair to good, and ICC: 0.75 to 1.00 excellent. ICC = intraclass correlation coefficient.
